# Supplementary material for: Potential path volume (PPV): a geometric estimator for space use in 3D
Source: PubMed Central journal article supplement (PMC6489342; doi:10.1186/s40462-019-0158-4), 2019-04-29
Supplement: 40462_2019_158_MOESM1_ESM.pdf [file 40462_2019_158_MOESM1_ESM.pdf]

## 1 **Additional file 1: Pseudocode for the PPV algorithm**

```
2 Input 1: a set of n trajectories with location measured in 3D, the longest with p segments
3 Input 2: size of the output volume, given by the number of voxels
4
5 Start algorithm
6 Initialise empty total accessibility volume AV of the size given above.
7 Outer Loop: for each trajectory
8     Initialise empty accessibility volume for this trajectory AV_traj
9
10    Inner Loop 1:
11    For each segment  $P_i - P_{i+1}$ 
12        Calculate distance  $d_i$  from  $P_i$  to  $P_{i+1}$  (eq. (2))
13        Calculate time difference  $\Delta t_i = t_{i+1} - t_i$ 
14        Calculate velocity on segment  $v_i = d_i / \Delta t_i$ 
15    End {for each segment}
16
17    Find maximum possible velocity on this trajectory:  $v_{max}$  (eq. (3))
18
19    Inner Loop 2:
20    For each segment  $P_i - P_{i+1}$ 
21        Calculate ellipsoid parameters: a, b,  $P_c$  (eq. (1,4,5))
22        Calculate rotation angles:  $\alpha$ ,  $\beta$  (eq. (6))
23
24        Inner Loop 3:
25        For each voxel in AV_traj
26            Take coordinates of the centre of the voxel (x,y,z)
27            Transform into new coordinates (x',y',z') (eq. (7,8))
28            If inside ellipsoid (eq. (9)) then
29                 $AV\_traj(voxel) = \max(AV\_traj(voxel), 1)$ 
30            End {for each voxel}
31        End {for each segment}
32    AV = max(AV, AV_traj)
33
34 End {for each trajectory}
35
36 Return: AV, a 0/1 volume of voxels being outside/inside the union of ellipsoids of all
37 segments of all trajectories
```
